# Supplementary material for: Critical assessment of synthetic accessibility scores in computer-assisted synthesis planning
Source: PubMed Central journal article supplement (PMC9840255; doi:10.1186/s13321-023-00678-z), 2023-01-14
Supplement: 13321_2023_678_MOESM2_ESM.pdf [file 13321_2023_678_MOESM2_ESM.pdf]

# Supplementary material to article *Critical assessment of synthetic accessibility scores in computer-assisted synthesis planning.*

Grzegorz Skoraczyński, Mateusz Kitlas, Błażej Miasojedow, Anna Gambin

## Supplementary Figures

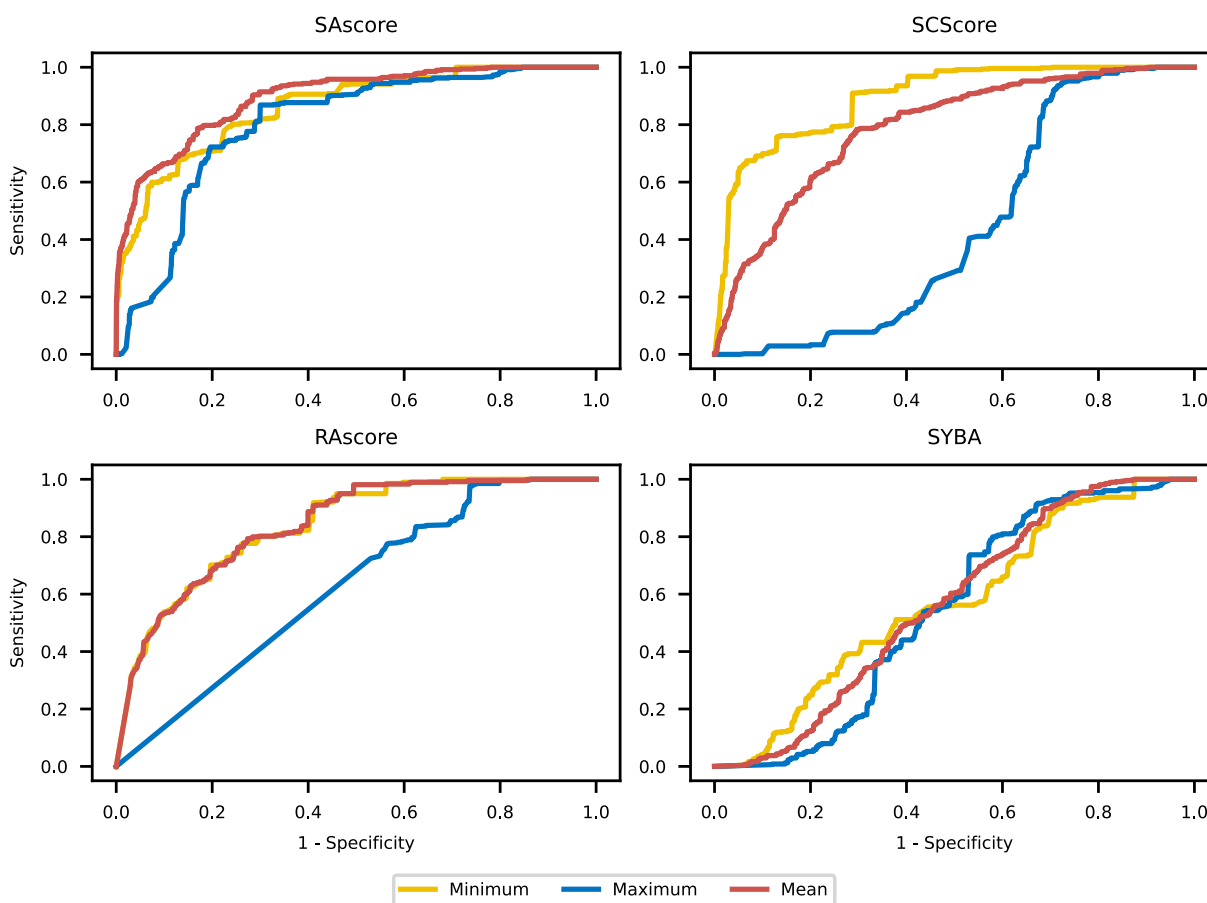

Supplementary Figure S 1 ROC curves for discrimination of solved and not solved nodes by synthetic accessibility scores.

## Supplementary Tables

|           | Score           | Exchanged score fraction | Std deviation | Mean     | Median |
|-----------|-----------------|--------------------------|---------------|----------|--------|
| <b>0</b>  | -               | 0                        | 2.966002      | 8.755102 | 9.0    |
| <b>1</b>  | SCScore minimum | 0.2375                   | 2.984759      | 8.775510 | 9.0    |
| <b>2</b>  | SCScore maximum | 0.2375                   | 3.016959      | 8.857143 | 9.0    |
| <b>3</b>  | SCScore minimum | 0.4750                   | 3.114369      | 8.877551 | 9.0    |
| <b>4</b>  | SCScore maximum | 0.4750                   | 2.948397      | 8.795918 | 9.0    |
| <b>5</b>  | SCScore minimum | 0.7125                   | 3.016821      | 8.795918 | 9.0    |
| <b>6</b>  | SCScore maximum | 0.7125                   | 3.026056      | 8.836735 | 9.0    |
| <b>7</b>  | SAScore minimum | 0.2375                   | 3.030320      | 8.795918 | 9.0    |
| <b>8</b>  | SAScore maximum | 0.2375                   | 2.950374      | 8.775510 | 9.0    |
| <b>9</b>  | SAScore minimum | 0.4750                   | 3.079537      | 8.836735 | 9.0    |
| <b>10</b> | SAScore maximum | 0.4750                   | 2.903415      | 8.755102 | 9.0    |
| <b>11</b> | SAScore minimum | 0.7125                   | 3.046222      | 8.836735 | 9.0    |
| <b>12</b> | SAScore maximum | 0.7125                   | 3.001180      | 8.816327 | 9.0    |
| <b>13</b> | SYBA minimum    | 0.2375                   | 2.952209      | 8.755102 | 9.0    |
| <b>14</b> | SYBA maximum    | 0.2375                   | 2.994372      | 8.816327 | 9.0    |
| <b>15</b> | SYBA minimum    | 0.4750                   | 2.976095      | 8.857143 | 9.0    |
| <b>16</b> | SYBA maximum    | 0.4750                   | 2.941467      | 8.795918 | 9.0    |
| <b>17</b> | SYBA minimum    | 0.7125                   | 2.998959      | 8.836735 | 9.0    |
| <b>18</b> | SYBA maximum    | 0.7125                   | 3.037047      | 8.795918 | 9.0    |

Supplementary Table S 1 Tree max depth for replacing a fraction of the reward with an appropriately scaled synthetic accessibility score (SAscore, SCScore, SYBA).

|           | <b>Score</b>    | <b>Exchanged score fraction</b> | <b>Std deviation</b> | <b>Mean</b> | <b>Median</b> |
|-----------|-----------------|---------------------------------|----------------------|-------------|---------------|
| <b>0</b>  | -               | 0                               | 79.605493            | 115.836735  | 104.0         |
| <b>1</b>  | SCScore minimum | 0.2375                          | 72.193571            | 112.918367  | 102.0         |
| <b>2</b>  | SCScore maximum | 0.2375                          | 92.332363            | 121.000000  | 106.0         |
| <b>3</b>  | SCScore minimum | 0.4750                          | 70.729288            | 115.979592  | 108.0         |
| <b>4</b>  | SCScore maximum | 0.4750                          | 79.498344            | 119.183673  | 108.0         |
| <b>5</b>  | SCScore minimum | 0.7125                          | 78.982919            | 119.326531  | 109.0         |
| <b>6</b>  | SCScore maximum | 0.7125                          | 71.927795            | 116.673469  | 109.0         |
| <b>7</b>  | SAScore minimum | 0.2375                          | 77.377965            | 118.448980  | 108.0         |
| <b>8</b>  | SAScore maximum | 0.2375                          | 80.494308            | 119.183673  | 106.0         |
| <b>9</b>  | SAScore minimum | 0.4750                          | 78.892469            | 119.244898  | 109.0         |
| <b>10</b> | SAScore maximum | 0.4750                          | 81.146876            | 120.204082  | 107.0         |
| <b>11</b> | SAScore minimum | 0.7125                          | 79.059502            | 119.408163  | 108.0         |
| <b>12</b> | SAScore maximum | 0.7125                          | 78.432918            | 119.306122  | 107.0         |
| <b>13</b> | SYBA minimum    | 0.2375                          | 67.852180            | 114.714286  | 108.0         |
| <b>14</b> | SYBA maximum    | 0.2375                          | 70.466778            | 115.673469  | 108.0         |
| <b>15</b> | SYBA minimum    | 0.4750                          | 79.456316            | 119.000000  | 108.0         |
| <b>16</b> | SYBA maximum    | 0.4750                          | 81.474173            | 120.285714  | 109.0         |
| <b>17</b> | SYBA minimum    | 0.7125                          | 93.411559            | 123.489796  | 109.0         |
| <b>18</b> | SYBA maximum    | 0.7125                          | 79.713763            | 120.040816  | 108.0         |

Supplementary Table S 2 Tree maximum width for replacing a fraction of the reward with an appropriately scaled synthetic accessibility score (SAscore, SCScore, SYBA).

|           | <b>Score</b>    | <b>Exchanged score fraction</b> | <b>Std deviation</b> | <b>Mean</b> | <b>Median</b> |
|-----------|-----------------|---------------------------------|----------------------|-------------|---------------|
| <b>0</b>  | -               | 0                               | 383.891782           | 624.448980  | 622.0         |
| <b>1</b>  | SCScore minimum | 0.2375                          | 357.194631           | 614.530612  | 616.0         |
| <b>2</b>  | SCScore maximum | 0.2375                          | 385.142319           | 641.918367  | 646.0         |
| <b>3</b>  | SCScore minimum | 0.4750                          | 362.632884           | 640.408163  | 650.0         |
| <b>4</b>  | SCScore maximum | 0.4750                          | 373.379975           | 645.081633  | 649.0         |
| <b>5</b>  | SCScore minimum | 0.7125                          | 360.175180           | 644.408163  | 649.0         |
| <b>6</b>  | SCScore maximum | 0.7125                          | 368.898435           | 645.836735  | 650.0         |
| <b>7</b>  | SAScore minimum | 0.2375                          | 373.173272           | 639.510204  | 645.0         |
| <b>8</b>  | SAScore maximum | 0.2375                          | 385.174569           | 644.979592  | 649.0         |
| <b>9</b>  | SAScore minimum | 0.4750                          | 372.952424           | 643.571429  | 650.0         |
| <b>10</b> | SAScore maximum | 0.4750                          | 388.082908           | 650.938776  | 649.0         |
| <b>11</b> | SAScore minimum | 0.7125                          | 364.409662           | 645.081633  | 640.0         |
| <b>12</b> | SAScore maximum | 0.7125                          | 363.200205           | 644.244898  | 650.0         |
| <b>13</b> | SYBA minimum    | 0.2375                          | 366.721196           | 636.183673  | 638.0         |
| <b>14</b> | SYBA maximum    | 0.2375                          | 365.604941           | 636.081633  | 651.0         |
| <b>15</b> | SYBA minimum    | 0.4750                          | 369.442529           | 640.816327  | 638.0         |
| <b>16</b> | SYBA maximum    | 0.4750                          | 388.511178           | 649.591837  | 648.0         |
| <b>17</b> | SYBA minimum    | 0.7125                          | 379.724067           | 651.571429  | 650.0         |
| <b>18</b> | SYBA maximum    | 0.7125                          | 361.971850           | 644.367347  | 650.0         |

Supplementary Table S 3 Tree node count for replacing a fraction of the reward with an appropriately scaled synthetic accessibility score (SAScore, SCScore, SYBA).

|    | <b>Score</b>    | <b>Exchanged score fraction</b> | <b>Std deviation</b> | <b>Mean</b> | <b>Median</b> |
|----|-----------------|---------------------------------|----------------------|-------------|---------------|
| 0  | -               | 0                               | 286.580406           | 223.551020  | 132.0         |
| 1  | SCScore minimum | 0.2375                          | 244.677409           | 211.836735  | 134.0         |
| 2  | SCScore maximum | 0.2375                          | 295.157197           | 230.326531  | 136.0         |
| 3  | SCScore minimum | 0.4750                          | 260.086613           | 223.122449  | 136.0         |
| 4  | SCScore maximum | 0.4750                          | 279.672345           | 229.306122  | 138.0         |
| 5  | SCScore minimum | 0.7125                          | 263.093437           | 225.081633  | 140.0         |
| 6  | SCScore maximum | 0.7125                          | 265.976406           | 227.020408  | 141.0         |
| 7  | SAScore minimum | 0.2375                          | 268.964581           | 225.183673  | 137.0         |
| 8  | SAScore maximum | 0.2375                          | 287.977563           | 230.673469  | 136.0         |
| 9  | SAScore minimum | 0.4750                          | 273.662586           | 227.183673  | 138.0         |
| 10 | SAScore maximum | 0.4750                          | 298.367672           | 234.448980  | 138.0         |
| 11 | SAScore minimum | 0.7125                          | 262.503722           | 225.571429  | 137.0         |
| 12 | SAScore maximum | 0.7125                          | 264.755605           | 225.979592  | 139.0         |
| 13 | SYBA minimum    | 0.2375                          | 263.764404           | 223.632653  | 140.0         |
| 14 | SYBA maximum    | 0.2375                          | 258.578303           | 222.469388  | 141.0         |
| 15 | SYBA minimum    | 0.4750                          | 269.348709           | 226.387755  | 135.0         |
| 16 | SYBA maximum    | 0.4750                          | 294.816401           | 232.938776  | 143.0         |
| 17 | SYBA minimum    | 0.7125                          | 286.012455           | 233.346939  | 137.0         |
| 18 | SYBA maximum    | 0.7125                          | 258.676774           | 224.142857  | 139.0         |

Supplementary Table S 4 Number of not solved leaves for replacing a fraction of the reward with an appropriately scaled synthetic accessibility score (SAscore, SCScore, SYBA).
